# Supplementary material for: Platelet membrane-coated nanoparticles for targeted drug delivery and local chemo-photothermal therapy of orthotopic hepatocellular carcinoma
Source: Royal Society of Chemistry journal article supplement (doi:10.1039/d0tb00735h), 2020-01-01
Supplement: d0tb00735h1.pdf [file d0tb00735h1.pdf]

# Supporting Information

## **Platelet Membrane-Coated Nanoparticles for Targeting Drug Delivery and Local**

### **Chemo-Photothermal Therapy of Orthotopic Hepatocellular Carcinoma**

Long Wu,<sup>1, 2, #</sup> Wei Xie,<sup>2, #</sup> Hui-Ming Zan,<sup>2, #</sup> Zhongzhong Liu,<sup>1</sup> Ganggang Wang,<sup>1</sup>

Yanfeng Wang,<sup>1, \*</sup> Wei Liu<sup>1, 2, \*</sup> and Wenfei Dong<sup>3, \*</sup>

<sup>1</sup> Hubei Key Laboratory of Medical Technology on Transplantation, Transplant Center of Wuhan University, Institute of Hepatobiliary Disease of Wuhan University, Zhongnan Hospital of Wuhan University, Wuhan 430071, China;

<sup>2</sup> Key Laboratory of Artificial Micro- and Nano- Structures of Ministry of Education, School of Physics and Technology, Wuhan University, Wuhan 430072, China;

<sup>3</sup> Key Laboratory of Bio-Medical Diagnostics, Suzhou Institute of Biomedical Engineering and Technology, Chinese Academy of Sciences, Suzhou 215163, China;

# These authors contributed equally to this work;

\* Corresponding author

Email: yanfengwang@whu.edu.cn; wliu@whu.edu.cn; wenfeidong@126.com

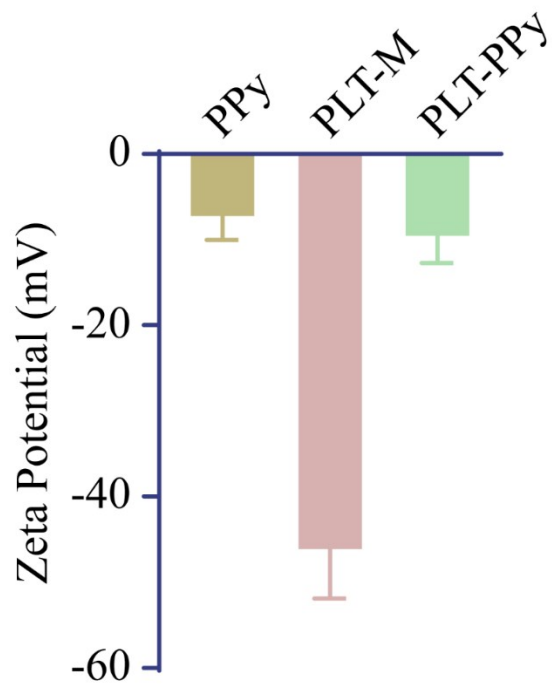

Figure S1. The zeta potential of PPy, PLT-M and PLT-PPy.

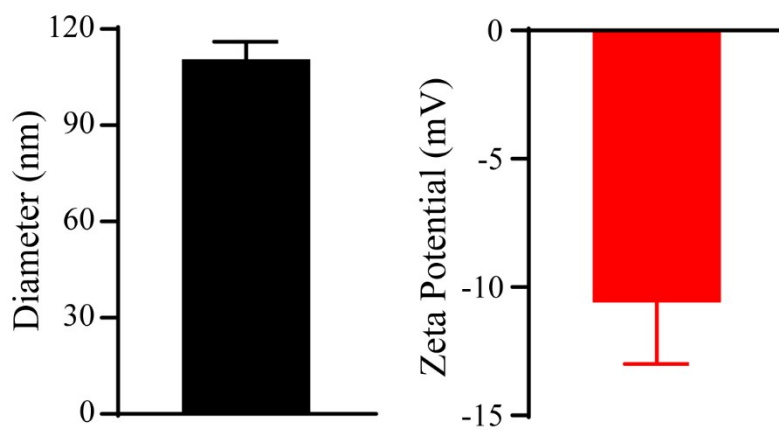

Figure S2. The diameter and zeta potential of PLT-PPy-DOX.

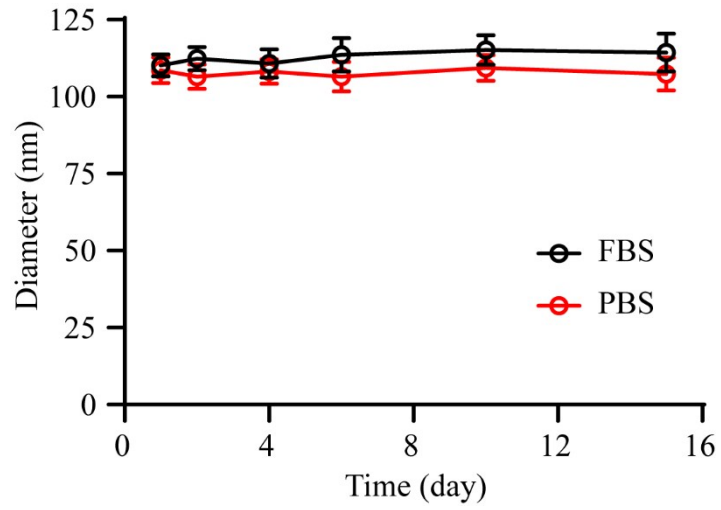

Figure S3. Stability of PLT-PPy-DOX in PBS and FBS. All error bars represent standard deviations (n = 6).

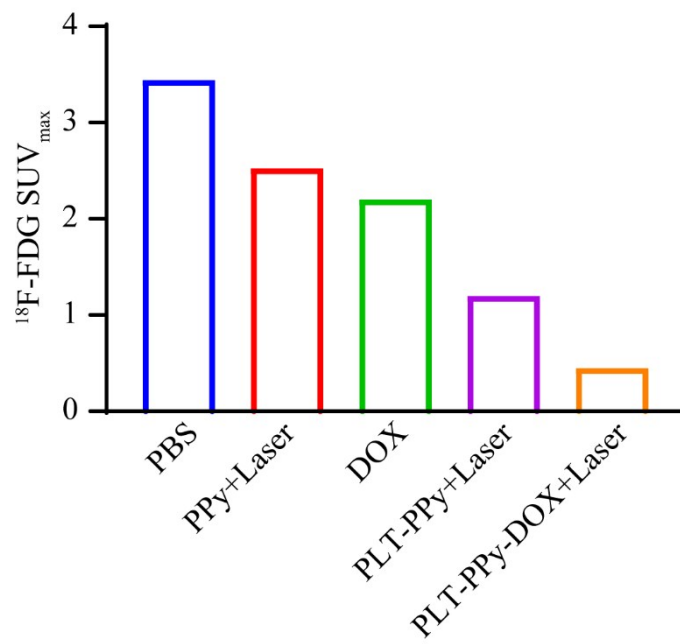

Figure S4. SUV<sub>max</sub> of mice taken with different treatment.

Table S1

Complete blood panel analysis.

| Group       | Unit                | PBS           | PPy           | DOX           | PLT-PPy       | PLT-PPy-DOX   |
|-------------|---------------------|---------------|---------------|---------------|---------------|---------------|
| <b>WBC</b>  | 10 <sup>9</sup> /L  | 7.93±1.85     | 8.17±2.35     | 7.84±1.72     | 8.04±2.14     | 8.02±2.02     |
| <b>RBC</b>  | 10 <sup>12</sup> /L | 11.4±1.82     | 11.99±2.21    | 11.32±1.71    | 11.85±1.84    | 11.76±1.81    |
| <b>HGB</b>  | g/L                 | 147.32±15.38  | 135.73±15.41  | 152.34±14.61  | 151.85±14.98  | 151.93±14.87  |
| <b>HCT</b>  | CV%                 | 46.21±7.12    | 47.07±6.89    | 46.88±6.72    | 47.31±7.23    | 47.03±7.04    |
| <b>MCV</b>  | fL                  | 54.12±4.16    | 50.83±3.96    | 54.67±3.94    | 55.72±4.18    | 55.02±4.03    |
| <b>MCH</b>  | pg                  | 14.89±0.92    | 14.98±0.87    | 14.76±0.78    | 15.21±0.84    | 15.01±0.81    |
| <b>MCHC</b> | g/L                 | 292.58±60.28  | 304.76±62.47  | 296.65±58.92  | 299.87±62.01  | 297.99±60.11  |
| <b>PLT</b>  | 10 <sup>9</sup> /L  | 918.76±198.51 | 909.32±203.63 | 899.56±186.21 | 908.74±217.85 | 906.67±209.23 |
| <b>RDW</b>  | CV%                 | 11.23±0.77    | 10.99±0.89    | 11.26±0.78    | 10.97±0.85    | 11.02±0.81    |

WBC: white blood cell; RBC: red blood cell; HGB: hemoglobin; HCT: hematocrit;

MCV: mean corpuscular volume; MCH: mean corpuscular hemoglobin; MCHC: mean corpuscular hemoglobin concentration; PLT: platelet; RDW: red blood cell distribution width.
